# Supplementary material
Source: PubMed Central journal article supplement (PMC9838213)
Supplement: NIHMS1856020-supplement-1.pdf [file NIHMS1856020-supplement-1.pdf]

## Supplementary material

Commonly used dose volume criteria for PTV and selected OARs for SBRT with a prescription of 3300 cGy in 5 fractions for pancreatic cancer.

| Structure               | Constraint Matrix                             |
|-------------------------|-----------------------------------------------|
| <b>PTV</b>              | V (3300 cGy) $\geq$ 95%, Ideal                |
|                         | V (3300 cGy) $\geq$ 80%, Acceptable           |
| <b>Spinal Cord</b>      | V ( $\geq$ 800 cGy) $\leq$ 1 cc. Acceptable   |
|                         | V ( $\geq$ 760 cGy) $\leq$ 1 cc. Ideal        |
| <b>Combined Kidneys</b> | V ( $\geq$ 1200 cGy) $\leq$ 50%. Acceptable   |
|                         | V ( $\geq$ 1200 cGy) $\leq$ 45%. Ideal        |
| <b>Liver</b>            | V ( $\geq$ 800 cGy) $\leq$ 1 cc. Acceptable   |
|                         | V ( $\geq$ 760 cGy) $\leq$ 1 cc. Ideal        |
|                         | D <sub>mean</sub> $\leq$ 2800 cGy. Acceptable |
|                         | D <sub>mean</sub> $\leq$ 2660 cGy. Ideal      |
| <b>Colon</b>            | V ( $\geq$ 1200 cGy) $\leq$ 50%. Acceptable   |
|                         | V ( $\geq$ 1200 cGy) $\leq$ 45%. Ideal        |
|                         | V ( $\geq$ 3300 cGy) $\leq$ 1 cc. Acceptable  |
|                         | V ( $\geq$ 3135 cGy) $\leq$ 1 cc. Ideal       |
|                         | V ( $\geq$ 2000 cGy) $\leq$ 3 cc. Acceptable  |
|                         | V ( $\geq$ 1900 cGy) $\leq$ 3 cc. Ideal       |
| <b>Small Bowel</b>      | V ( $\geq$ 2000 cGy) $\leq$ 3 cc. Acceptable  |
|                         | V ( $\geq$ 1900 cGy) $\leq$ 3 cc. Ideal       |
|                         | V ( $\geq$ 3300 cGy) $\leq$ 1 cc. Acceptable  |
|                         | V ( $\geq$ 3135 cGy) $\leq$ 1 cc. Ideal       |
| <b>Stomach</b>          | V ( $\geq$ 2000 cGy) $\leq$ 3 cc. Acceptable  |
|                         | V ( $\geq$ 1900 cGy) $\leq$ 3 cc. Ideal       |
|                         | V ( $\geq$ 3300 cGy) $\leq$ 1 cc. Acceptable  |
|                         | V ( $\geq$ 3135 cGy) $\leq$ 1 cc. Ideal       |
| <b>Duodenum</b>         | V ( $\geq$ 2000 cGy) $\leq$ 3 cc. Acceptable  |
|                         | V ( $\geq$ 1900 cGy) $\leq$ 3 cc. Ideal       |
|                         | V ( $\geq$ 3300 cGy) $\leq$ 1 cc. Acceptable  |

|             |                                                      |
|-------------|------------------------------------------------------|
| <b>Skin</b> | $V (\geq 3135 \text{ cGy}) \leq 1 \text{ cc. Ideal}$ |
|             | $V (\geq 760 \text{ cGy}) \leq 1 \text{ cc. Ideal}$  |
|             | $D_{\max} \leq 3200 \text{ cGy. Acceptable}$         |
|             | $D_{\max} \leq 3040 \text{ cGy. Ideal}$              |

F-test to verify that samples come from distribution of unequal variances, followed by a two tailed T-test with unequal variance p-values calculated in excel as a secondary check of the significance of t-test p-value levels

| F-Test Two-Sample for Variances     |            |             | F-Test Two-Sample for Variances |              |            | F-Test Two-Sample for Variances |             |              |
|-------------------------------------|------------|-------------|---------------------------------|--------------|------------|---------------------------------|-------------|--------------|
| <i>Feature 1</i>                    | <i>ATS</i> | <i>ATP</i>  | <i>Feature 2</i>                | <i>ATS</i>   | <i>ATP</i> | <i>Feature 3</i>                | <i>ATS</i>  | <i>ATP</i>   |
| Mean                                | -0.8777809 | 0.132861877 | Mean                            | -0.162333282 | -1.12054   | Mean                            | 0.169483839 | -0.050298652 |
| Variance                            | 2.73515146 | 0.005661604 | Variance                        | 3.595234504  | 0.563197   | Variance                        | 0.206209513 | 0.026940003  |
| Observations                        | 24         | 23          | Observations                    | 66           | 23         | Observations                    | 66          | 23           |
| df                                  | 23         | 22          | df                              | 65           | 22         | df                              | 65          | 22           |
| F                                   | 483.105394 |             | F                               | 6.383617645  |            | F                               | 7.654398179 |              |
| P(F<=f) one-tail                    | 8.8282E-25 |             | P(F<=f) one-tail                | 5.96138E-06  |            | P(F<=f) one-tail                | 1.12687E-06 |              |
| F Critical one-tail                 | 2.03766616 |             | F Critical one-tail             | 1.881732377  |            | F Critical one-tail             | 1.881732377 |              |
| T-Test Two-Sample unequal Variances |            |             |                                 |              |            |                                 |             |              |
| 1.20914E-07                         |            |             | 0.000993473                     |              |            | 0.001184821                     |             |              |
